# Supplementary material for: Efficient and Robust Paramyxoviridae Reverse Genetics Systems
Source: PubMed Central journal article supplement (PMC5371697; doi:10.1128/msphere.00376-16), 2017-03-29
Supplement: sph002172258st1.pdf [file sph002172258st1.pdf]

|                                            | <b>Forward primer</b>           | <b>Reverse primer</b>            |
|--------------------------------------------|---------------------------------|----------------------------------|
| <b>rNDV<sup>LaSota</sup>-EGFP (qA)</b>     | 5' - TCTAGACTCCGTCACCAAACA - 3' | 5' - AGGAGCTGTTTCGTACTCATCA - 3' |
| <b>rNDV<sup>LaSota</sup>-EGFP (qB)</b>     | 5' - TGATGAGTACGAACAGCTCCT - 3' | 5' - CCTGAGTGGTTTGTGGCAT - 3'    |
| <b>rMuV<sup>JL5</sup>-EGFP (qA)</b>        | 5' - TCTAGACTCCGTCACCAAGG - 3'  | 5' - CCTCACCCCTGTCTTGAAGT - 3'   |
| <b>rMuV<sup>JL5</sup>-EGFP (qB)</b>        | 5' - ACTTCAAGACAGGGGTGAGG - 3'  | 5' - ATCTGAGCTTCGGGTGATCT - 3'   |
| <b>rMeV<sup>EdmonstonB</sup>-EGFP (qA)</b> | 5' - TCTAGACTCCGTCACCAAACA - 3' | 5' - GCTGAACTTGTGGCCGTTTA - 3'   |
| <b>rMeV<sup>EdmonstonB</sup>-EGFP (qB)</b> | 5' - TAAACGGCCACAAGTTCAGC - 3'  | 5' - AAGTCGTGCTGCTTCATGTG - 3'   |
| <b>rNiV<sup>Malaysia</sup>-EGFP (qA)</b>   | 5' - TCTAGACTCCGTCACCAAACA - 3' | 5' - GCTGAACTTGTGGCCGTTTA - 3'   |
| <b>rNiV<sup>Malaysia</sup>-EGFP (qB)</b>   | 5' - ACGTAAACGGCCACAAGTTC - 3'  | 5' - AAGTCGTGCTGCTTCATGTG - 3'   |
| <b>rSeV<sup>Fushimi</sup>-EGFP (qA)</b>    | 5' - TCTAGACTCCGTCACCAAACA - 3' | 5' - GCACCTCCTCCCGACTTATT - 3'   |
| <b>rSeV<sup>Fushimi</sup>-EGFP (qB)</b>    | 5' - AATAAGTCGGGAGGAGGTGC - 3'  | 5' - AAGCAGAGAGACGAGGAACC - 3'   |
